# Supplementary material
Source: publisher figshare collection journal article supplement (https://acs.figshare.com/ndownloader/files/3671367)
Supplement: Supplementary file 1 [file 3671367]

  
data_baran99 
  
_audit_creation_method            SHELXL-97 
_chemical_name_systematic 
; 
 ? 
; 
_chemical_name_common             ? 
_chemical_melting_point           ? 
_chemical_formula_moiety          ? 
_chemical_formula_sum 
 'C40 H48 O7' 
_chemical_formula_weight          640.78 
  
loop_ 
 _atom_type_symbol 
 _atom_type_description 
 _atom_type_scat_dispersion_real 
 _atom_type_scat_dispersion_imag 
 _atom_type_scat_source 
 'C'  'C'   0.0033   0.0016 
 'International Tables Vol C Tables 4.2.6.8 and 6.1.1.4' 
 'H'  'H'   0.0000   0.0000 
 'International Tables Vol C Tables 4.2.6.8 and 6.1.1.4' 
 'O'  'O'   0.0106   0.0060 
 'International Tables Vol C Tables 4.2.6.8 and 6.1.1.4' 
  
_symmetry_cell_setting            Orthorhombic 
_symmetry_space_group_name_H-M    P2(1)2(1)2(1) 
  
loop_ 
 _symmetry_equiv_pos_as_xyz 
 'x, y, z' 
 '-x+1/2, -y, z+1/2' 
 '-x, y+1/2, -z+1/2' 
 'x+1/2, -y+1/2, -z' 
  
_cell_length_a                    8.8935(7) 
_cell_length_b                    10.0417(8) 
_cell_length_c                    36.708(3) 
_cell_angle_alpha                 90.00 
_cell_angle_beta                  90.00 
_cell_angle_gamma                 90.00 
_cell_volume                      3278.3(4) 
_cell_formula_units_Z             4 
_cell_measurement_temperature     123(2) 
_cell_measurement_reflns_used     9626 
_cell_measurement_theta_min       2.31 
_cell_measurement_theta_max       25.42 
  
_exptl_crystal_description        plate 
_exptl_crystal_colour             orange
_exptl_crystal_size_max           0.40 
_exptl_crystal_size_mid           0.30 
_exptl_crystal_size_min           0.08 
_exptl_crystal_density_meas       ? 
_exptl_crystal_density_diffrn     1.298 
_exptl_crystal_density_method     'not measured' 
_exptl_crystal_F_000              1376 
_exptl_absorpt_coefficient_mu     0.088 
_exptl_absorpt_correction_type    multi-scan 
_exptl_absorpt_correction_T_min   0.9658 
_exptl_absorpt_correction_T_max   0.9930 
_exptl_absorpt_process_details    sadabs 
  
_exptl_special_details 
; 
 ? 
; 
  
_diffrn_ambient_temperature       123(2) 
_diffrn_radiation_wavelength      0.71073 
_diffrn_radiation_type            MoK\a 
_diffrn_radiation_source          'fine-focus sealed tube' 
_diffrn_radiation_monochromator   graphite 
_diffrn_measurement_device_type   'Bruker APEX-II CCD' 
_diffrn_measurement_method        '\f and \w scans' 
_diffrn_reflns_number             31138 
_diffrn_reflns_av_R_equivalents   0.0371 
_diffrn_reflns_av_sigmaI/netI     0.0302 
_diffrn_reflns_limit_h_min        -10 
_diffrn_reflns_limit_h_max        10 
_diffrn_reflns_limit_k_min        -12 
_diffrn_reflns_limit_k_max        11 
_diffrn_reflns_limit_l_min        -44 
_diffrn_reflns_limit_l_max        44 
_diffrn_reflns_theta_min          2.10 
_diffrn_reflns_theta_max          25.42 
_reflns_number_total              6040 
_reflns_number_gt                 5660 
_reflns_threshold_expression      >2sigma(I) 
  
_computing_data_collection        'Bruker APEX2' 
_computing_cell_refinement        'Bruker SAINT' 
_computing_data_reduction         'Bruker SAINT' 
_computing_structure_solution     'SHELXS-97 (Sheldrick, 1990)' 
_computing_structure_refinement   'SHELXL-97 (Sheldrick, 1997)' 
_computing_molecular_graphics     'Bruker SHELXTL' 
_computing_publication_material   'Bruker SHELXTL' 
  
_refine_special_details 
; 
 Refinement of F^2^ against ALL reflections.  The weighted R-factor wR and 
 goodness of fit S are based on F^2^, conventional R-factors R are based 
 on F, with F set to zero for negative F^2^. The threshold expression of 
 F^2^ > 2sigma(F^2^) is used only for calculating R-factors(gt) etc. and is 
 not relevant to the choice of reflections for refinement.  R-factors based 
 on F^2^ are statistically about twice as large as those based on F, and R- 
 factors based on ALL data will be even larger. 
; 
  
_refine_ls_structure_factor_coef  Fsqd 
_refine_ls_matrix_type            full 
_refine_ls_weighting_scheme       calc 
_refine_ls_weighting_details 
 'calc w=1/[\s^2^(Fo^2^)+(0.0500P)^2^+0.7000P] where P=(Fo^2^+2Fc^2^)/3' 
_atom_sites_solution_primary      direct 
_atom_sites_solution_secondary    difmap 
_atom_sites_solution_hydrogens    geom 
_refine_ls_hydrogen_treatment     constr
_refine_ls_extinction_method      none 
_refine_ls_extinction_coef        ? 
_refine_ls_abs_structure_details 
 'Flack H D (1983), Acta Cryst. A39, 876-881' 
_refine_ls_abs_structure_Flack    0.2(8) 
_refine_ls_number_reflns          6040 
_refine_ls_number_parameters      424 
_refine_ls_number_restraints      0 
_refine_ls_R_factor_all           0.0406 
_refine_ls_R_factor_gt            0.0370 
_refine_ls_wR_factor_ref          0.0933 
_refine_ls_wR_factor_gt           0.0913 
_refine_ls_goodness_of_fit_ref    1.048 
_refine_ls_restrained_S_all       1.048 
_refine_ls_shift/su_max           0.032 
_refine_ls_shift/su_mean          0.004 
  
loop_ 
 _atom_site_label 
 _atom_site_type_symbol 
 _atom_site_fract_x 
 _atom_site_fract_y 
 _atom_site_fract_z 
 _atom_site_U_iso_or_equiv 
 _atom_site_adp_type 
 _atom_site_occupancy 
 _atom_site_symmetry_multiplicity 
 _atom_site_calc_flag 
 _atom_site_refinement_flags 
 _atom_site_disorder_assembly 
 _atom_site_disorder_group 
O1 O -0.88518(16) 0.85105(13) -0.14263(3) 0.0238(3) Uani 1 1 d . . . 
O2 O -0.79330(17) 0.63983(14) -0.14436(3) 0.0302(3) Uani 1 1 d . . . 
O3 O 0.08632(15) 0.94172(13) 0.19225(4) 0.0233(3) Uani 1 1 d . . . 
O4 O 0.27287(14) 1.09808(14) 0.18894(4) 0.0249(3) Uani 1 1 d . . . 
O5 O -0.45141(15) 1.20065(14) 0.09716(3) 0.0251(3) Uani 1 1 d . . . 
O6 O -0.67001(15) 1.56583(13) 0.19013(4) 0.0238(3) Uani 1 1 d . . . 
O7 O -0.76222(16) 1.57499(14) 0.11907(4) 0.0289(3) Uani 1 1 d . . . 
C1 C -0.8096(3) 0.8365(2) -0.17628(5) 0.0330(5) Uani 1 1 d . . . 
H1A H -0.7362 0.9094 -0.1798 0.040 Uiso 1 1 calc R . . 
H1B H -0.8821 0.8375 -0.1967 0.040 Uiso 1 1 calc R . . 
C2 C -0.7325(4) 0.7072(3) -0.17419(7) 0.0525(8) Uani 1 1 d . . . 
H2A H -0.7490 0.6557 -0.1968 0.063 Uiso 1 1 calc R . . 
H2B H -0.6230 0.7203 -0.1709 0.063 Uiso 1 1 calc R . . 
C3 C -0.8558(2) 0.73633(19) -0.12047(5) 0.0231(4) Uani 1 1 d . . . 
C4 C -1.0023(2) 0.6869(2) -0.10306(5) 0.0300(5) Uani 1 1 d . . . 
H4A H -1.0024 0.5885 -0.1014 0.036 Uiso 1 1 calc R . . 
H4B H -1.0900 0.7152 -0.1177 0.036 Uiso 1 1 calc R . . 
C5 C -1.0088(2) 0.7497(2) -0.06458(5) 0.0309(5) Uani 1 1 d . . . 
H5A H -1.1044 0.7982 -0.0608 0.037 Uiso 1 1 calc R . . 
H5B H -0.9982 0.6809 -0.0454 0.037 Uiso 1 1 calc R . . 
C6 C -0.8747(2) 0.8452(2) -0.06439(5) 0.0211(4) Uani 1 1 d . . . 
H6A H -0.9071 0.9254 -0.0785 0.025 Uiso 1 1 calc R . . 
C7 C -0.7554(2) 0.77516(19) -0.08777(5) 0.0222(4) Uani 1 1 d . . . 
C8 C -0.6967(3) 0.6456(2) -0.07058(6) 0.0352(5) Uani 1 1 d . . . 
H8A H -0.6326 0.6671 -0.0497 0.053 Uiso 1 1 calc R . . 
H8B H -0.6381 0.5960 -0.0887 0.053 Uiso 1 1 calc R . . 
H8C H -0.7819 0.5913 -0.0625 0.053 Uiso 1 1 calc R . . 
C9 C -0.6263(2) 0.8712(2) -0.09510(5) 0.0291(5) Uani 1 1 d . . . 
H9A H -0.6622 0.9444 -0.1109 0.035 Uiso 1 1 calc R . . 
H9B H -0.5450 0.8238 -0.1082 0.035 Uiso 1 1 calc R . . 
C10 C -0.5632(2) 0.9303(2) -0.05934(5) 0.0314(5) Uani 1 1 d . . . 
H10A H -0.5141 0.8586 -0.0452 0.038 Uiso 1 1 calc R . . 
H10B H -0.4859 0.9978 -0.0653 0.038 Uiso 1 1 calc R . . 
C11 C -0.6859(2) 0.9950(2) -0.03596(5) 0.0220(4) Uani 1 1 d . . . 
H11A H -0.7295 1.0692 -0.0507 0.026 Uiso 1 1 calc R . . 
C12 C -0.8150(2) 0.8969(2) -0.02825(5) 0.0211(4) Uani 1 1 d . . . 
H12A H -0.7745 0.8201 -0.0140 0.025 Uiso 1 1 calc R . . 
C13 C -0.9349(2) 0.9662(2) -0.00570(5) 0.0264(5) Uani 1 1 d . . . 
H13A H -1.0235 0.9073 -0.0032 0.032 Uiso 1 1 calc R . . 
H13B H -0.9674 1.0487 -0.0182 0.032 Uiso 1 1 calc R . . 
C14 C -0.8734(2) 1.0005(2) 0.03192(5) 0.0301(5) Uani 1 1 d . . . 
H14A H -0.9424 1.0645 0.0438 0.036 Uiso 1 1 calc R . . 
H14B H -0.8711 0.9187 0.0469 0.036 Uiso 1 1 calc R . . 
C15 C -0.7172(2) 1.0601(2) 0.03069(5) 0.0220(4) Uani 1 1 d . . . 
C16 C -0.6277(2) 1.05670(19) -0.00074(5) 0.0209(4) Uani 1 1 d . . . 
C17 C -0.6596(2) 1.1135(2) 0.06287(5) 0.0237(4) Uani 1 1 d . . . 
H17A H -0.7200 1.1150 0.0842 0.028 Uiso 1 1 calc R . . 
C18 C -0.5163(2) 1.16383(19) 0.06385(5) 0.0223(4) Uani 1 1 d . . . 
C19 C -0.4268(2) 1.1650(2) 0.03332(5) 0.0257(4) Uani 1 1 d . . . 
H19A H -0.3282 1.2012 0.0342 0.031 Uiso 1 1 calc R . . 
C20 C -0.4840(2) 1.1119(2) 0.00120(5) 0.0243(4) Uani 1 1 d . . . 
H20A H -0.4233 1.1133 -0.0201 0.029 Uiso 1 1 calc R . . 
C21 C 0.1993(2) 0.8941(2) 0.16773(5) 0.0266(4) Uani 1 1 d . . . 
H21A H 0.1724 0.9132 0.1421 0.032 Uiso 1 1 calc R . . 
H21B H 0.2156 0.7972 0.1706 0.032 Uiso 1 1 calc R . . 
C22 C 0.3358(2) 0.9725(2) 0.17947(6) 0.0263(5) Uani 1 1 d . . . 
H22A H 0.3859 0.9305 0.2006 0.032 Uiso 1 1 calc R . . 
H22B H 0.4091 0.9813 0.1593 0.032 Uiso 1 1 calc R . . 
C23 C 0.1230(2) 1.07617(19) 0.20157(5) 0.0205(4) Uani 1 1 d . . . 
C24 C 0.1048(2) 1.0945(2) 0.24296(5) 0.0234(4) Uani 1 1 d . . . 
H24A H 0.1844 1.1538 0.2526 0.028 Uiso 1 1 calc R . . 
H24B H 0.1116 1.0076 0.2556 0.028 Uiso 1 1 calc R . . 
C25 C -0.0520(2) 1.1574(2) 0.24899(5) 0.0226(4) Uani 1 1 d . . . 
H25A H -0.1121 1.1041 0.2664 0.027 Uiso 1 1 calc R . . 
H25B H -0.0430 1.2496 0.2583 0.027 Uiso 1 1 calc R . . 
C26 C -0.1230(2) 1.15581(18) 0.21098(5) 0.0171(4) Uani 1 1 d . . . 
H26A H -0.1608 1.0633 0.2067 0.020 Uiso 1 1 calc R . . 
C27 C 0.0116(2) 1.17667(18) 0.18502(5) 0.0174(4) Uani 1 1 d . . . 
C28 C -0.0394(2) 1.1514(2) 0.14589(5) 0.0209(4) Uani 1 1 d . . . 
H28A H -0.0681 1.0566 0.1431 0.025 Uiso 1 1 calc R . . 
H28B H 0.0449 1.1697 0.1290 0.025 Uiso 1 1 calc R . . 
C29 C -0.1737(2) 1.2401(2) 0.13598(5) 0.0214(4) Uani 1 1 d . . . 
H29A H -0.2081 1.2182 0.1110 0.026 Uiso 1 1 calc R . . 
H29B H -0.1416 1.3345 0.1362 0.026 Uiso 1 1 calc R . . 
C30 C -0.3055(2) 1.22137(19) 0.16293(5) 0.0178(4) Uani 1 1 d . . . 
H30A H -0.3372 1.1259 0.1618 0.021 Uiso 1 1 calc R . . 
C31 C -0.2513(2) 1.24955(18) 0.20201(4) 0.0162(4) Uani 1 1 d . . . 
H31A H -0.2091 1.3419 0.2021 0.019 Uiso 1 1 calc R . . 
C32 C -0.3835(2) 1.24870(19) 0.22823(5) 0.0202(4) Uani 1 1 d . . . 
H32A H -0.3468 1.2533 0.2537 0.024 Uiso 1 1 calc R . . 
H32B H -0.4420 1.1655 0.2253 0.024 Uiso 1 1 calc R . . 
C33 C -0.4822(2) 1.3687(2) 0.21990(5) 0.0213(4) Uani 1 1 d . . . 
H33A H -0.5794 1.3592 0.2328 0.026 Uiso 1 1 calc R . . 
H33B H -0.4325 1.4505 0.2290 0.026 Uiso 1 1 calc R . . 
C34 C -0.5107(2) 1.38214(19) 0.17975(5) 0.0180(4) Uani 1 1 d . . . 
C35 C -0.4423(2) 1.30655(18) 0.15415(5) 0.0166(4) Uani 1 1 d . . . 
C36 C -0.5074(2) 1.30399(19) 0.11695(5) 0.0195(4) Uani 1 1 d . . . 
C37 C -0.6120(2) 1.38951(19) 0.10455(5) 0.0216(4) Uani 1 1 d . . . 
H37A H -0.6463 1.3834 0.0801 0.026 Uiso 1 1 calc R . . 
C38 C -0.6718(2) 1.49015(19) 0.12834(5) 0.0210(4) Uani 1 1 d . . . 
C39 C -0.6212(2) 1.48476(18) 0.16878(5) 0.0185(4) Uani 1 1 d . . . 
C40 C 0.0830(2) 1.31533(19) 0.18808(5) 0.0231(4) Uani 1 1 d . . . 
H40A H 0.1673 1.3222 0.1710 0.035 Uiso 1 1 calc R . . 
H40B H 0.1196 1.3291 0.2130 0.035 Uiso 1 1 calc R . . 
H40C H 0.0078 1.3833 0.1822 0.035 Uiso 1 1 calc R . . 
  
loop_ 
 _atom_site_aniso_label 
 _atom_site_aniso_U_11 
 _atom_site_aniso_U_22 
 _atom_site_aniso_U_33 
 _atom_site_aniso_U_23 
 _atom_site_aniso_U_13 
 _atom_site_aniso_U_12 
O1 0.0326(7) 0.0219(7) 0.0169(6) 0.0022(5) -0.0005(6) 0.0085(6) 
O2 0.0481(9) 0.0197(7) 0.0229(7) -0.0044(6) -0.0063(6) 0.0067(7) 
O3 0.0232(7) 0.0172(7) 0.0297(7) -0.0024(6) 0.0048(6) 0.0019(5) 
O4 0.0160(6) 0.0241(8) 0.0345(7) -0.0027(6) 0.0025(6) -0.0004(5) 
O5 0.0263(7) 0.0255(7) 0.0235(7) -0.0103(6) -0.0086(6) 0.0075(6) 
O6 0.0224(7) 0.0210(7) 0.0280(7) -0.0023(6) 0.0032(6) 0.0032(6) 
O7 0.0274(7) 0.0262(8) 0.0332(7) 0.0007(6) -0.0070(6) 0.0087(6) 
C1 0.0472(13) 0.0282(12) 0.0235(10) 0.0007(9) 0.0075(9) 0.0083(10) 
C2 0.080(2) 0.0358(15) 0.0414(13) 0.0091(11) 0.0270(14) 0.0255(14) 
C3 0.0315(11) 0.0165(10) 0.0214(9) -0.0010(8) -0.0054(8) 0.0026(8) 
C4 0.0352(11) 0.0288(12) 0.0261(10) 0.0009(9) -0.0081(9) -0.0094(9) 
C5 0.0320(11) 0.0372(13) 0.0234(9) 0.0017(9) -0.0015(9) -0.0130(10) 
C6 0.0226(9) 0.0232(10) 0.0173(8) 0.0019(8) -0.0036(8) -0.0030(8) 
C7 0.0273(10) 0.0177(10) 0.0215(9) -0.0009(8) -0.0061(8) 0.0004(8) 
C8 0.0464(13) 0.0314(13) 0.0279(10) -0.0009(9) -0.0137(10) 0.0105(11) 
C9 0.0263(10) 0.0349(12) 0.0260(10) -0.0086(9) 0.0032(9) -0.0039(9) 
C10 0.0242(10) 0.0412(13) 0.0288(10) -0.0128(10) 0.0025(9) -0.0081(10) 
C11 0.0240(10) 0.0232(10) 0.0187(9) -0.0023(8) -0.0004(8) -0.0019(8) 
C12 0.0220(9) 0.0221(10) 0.0193(9) 0.0020(8) -0.0017(8) -0.0037(8) 
C13 0.0230(10) 0.0377(13) 0.0184(9) -0.0018(8) 0.0000(8) -0.0082(9) 
C14 0.0271(11) 0.0413(13) 0.0220(10) -0.0056(9) 0.0036(9) -0.0086(10) 
C15 0.0222(10) 0.0236(10) 0.0201(9) -0.0033(8) -0.0020(8) -0.0002(8) 
C16 0.0249(10) 0.0181(10) 0.0197(9) -0.0011(8) -0.0014(8) -0.0025(8) 
C17 0.0258(10) 0.0253(11) 0.0199(9) -0.0031(8) 0.0014(8) 0.0023(8) 
C18 0.0273(10) 0.0188(10) 0.0210(9) -0.0047(8) -0.0080(8) 0.0047(8) 
C19 0.0238(10) 0.0230(10) 0.0304(10) -0.0058(9) -0.0025(8) -0.0028(8) 
C20 0.0256(10) 0.0256(11) 0.0216(9) -0.0032(8) 0.0023(8) -0.0052(8) 
C21 0.0252(10) 0.0236(11) 0.0311(10) -0.0048(9) 0.0031(8) 0.0053(8) 
C22 0.0213(10) 0.0271(11) 0.0305(10) -0.0044(9) 0.0011(8) 0.0067(8) 
C23 0.0154(8) 0.0193(10) 0.0269(9) -0.0003(8) 0.0002(8) -0.0019(8) 
C24 0.0227(10) 0.0244(11) 0.0231(9) 0.0008(8) -0.0028(8) 0.0034(8) 
C25 0.0215(9) 0.0261(11) 0.0201(9) 0.0019(8) -0.0022(8) 0.0045(8) 
C26 0.0175(9) 0.0146(9) 0.0191(8) 0.0007(7) 0.0006(7) -0.0020(8) 
C27 0.0156(9) 0.0162(9) 0.0205(9) -0.0006(7) 0.0013(7) 0.0003(7) 
C28 0.0189(9) 0.0240(10) 0.0198(9) -0.0021(8) 0.0022(7) 0.0013(8) 
C29 0.0205(9) 0.0260(10) 0.0176(8) 0.0015(8) 0.0012(7) 0.0008(8) 
C30 0.0177(9) 0.0158(10) 0.0201(9) -0.0020(7) -0.0019(7) -0.0009(7) 
C31 0.0182(9) 0.0134(9) 0.0170(8) -0.0001(7) -0.0002(7) -0.0005(7) 
C32 0.0197(9) 0.0208(10) 0.0200(9) 0.0017(8) 0.0008(7) 0.0007(8) 
C33 0.0185(9) 0.0243(10) 0.0211(9) 0.0009(8) 0.0021(7) 0.0006(8) 
C34 0.0150(9) 0.0168(9) 0.0221(9) 0.0010(7) 0.0006(7) -0.0029(7) 
C35 0.0158(9) 0.0148(9) 0.0193(8) 0.0024(7) -0.0005(7) -0.0023(7) 
C36 0.0179(9) 0.0203(10) 0.0203(9) -0.0028(8) -0.0007(8) -0.0018(8) 
C37 0.0217(9) 0.0235(10) 0.0197(8) 0.0001(8) -0.0046(8) -0.0005(8) 
C38 0.0167(9) 0.0208(10) 0.0254(10) 0.0028(8) -0.0010(8) -0.0023(8) 
C39 0.0136(8) 0.0192(10) 0.0225(9) -0.0002(8) 0.0017(7) -0.0046(8) 
C40 0.0202(10) 0.0187(10) 0.0305(10) 0.0006(8) 0.0002(8) -0.0030(7) 
  
_geom_special_details 
; 
 All esds (except the esd in the dihedral angle between two l.s. planes) 
 are estimated using the full covariance matrix.  The cell esds are taken 
 into account individually in the estimation of esds in distances, angles 
 and torsion angles; correlations between esds in cell parameters are only 
 used when they are defined by crystal symmetry.  An approximate (isotropic) 
 treatment of cell esds is used for estimating esds involving l.s. planes. 
; 
  
loop_ 
 _geom_bond_atom_site_label_1 
 _geom_bond_atom_site_label_2 
 _geom_bond_distance 
 _geom_bond_site_symmetry_2 
 _geom_bond_publ_flag 
O1 C1 1.414(2) . ? 
O1 C3 1.434(2) . ? 
O2 C2 1.396(3) . ? 
O2 C3 1.420(2) . ? 
O3 C23 1.430(2) . ? 
O3 C21 1.431(2) . ? 
O4 C22 1.423(2) . ? 
O4 C23 1.428(2) . ? 
O5 C36 1.361(2) . ? 
O5 C18 1.401(2) . ? 
O6 C39 1.211(2) . ? 
O7 C38 1.220(2) . ? 
C1 C2 1.470(3) . ? 
C3 C4 1.533(3) . ? 
C3 C7 1.546(3) . ? 
C4 C5 1.548(3) . ? 
C5 C6 1.530(3) . ? 
C6 C12 1.520(2) . ? 
C6 C7 1.536(3) . ? 
C7 C9 1.523(3) . ? 
C7 C8 1.537(3) . ? 
C9 C10 1.546(3) . ? 
C10 C11 1.533(3) . ? 
C11 C16 1.524(3) . ? 
C11 C12 1.539(3) . ? 
C12 C13 1.519(3) . ? 
C13 C14 1.524(3) . ? 
C14 C15 1.513(3) . ? 
C15 C17 1.394(3) . ? 
C15 C16 1.402(3) . ? 
C16 C20 1.395(3) . ? 
C17 C18 1.372(3) . ? 
C18 C19 1.374(3) . ? 
C19 C20 1.390(3) . ? 
C21 C22 1.510(3) . ? 
C23 C27 1.539(3) . ? 
C23 C24 1.539(2) . ? 
C24 C25 1.546(3) . ? 
C25 C26 1.532(2) . ? 
C26 C31 1.515(2) . ? 
C26 C27 1.544(2) . ? 
C27 C28 1.528(2) . ? 
C27 C40 1.535(3) . ? 
C28 C29 1.534(3) . ? 
C29 C30 1.546(2) . ? 
C30 C35 1.522(2) . ? 
C30 C31 1.540(2) . ? 
C31 C32 1.520(2) . ? 
C32 C33 1.523(3) . ? 
C33 C34 1.502(2) . ? 
C34 C35 1.353(3) . ? 
C34 C39 1.479(3) . ? 
C35 C36 1.483(2) . ? 
C36 C37 1.345(3) . ? 
C37 C38 1.438(3) . ? 
C38 C39 1.552(3) . ? 
  
loop_ 
 _geom_angle_atom_site_label_1 
 _geom_angle_atom_site_label_2 
 _geom_angle_atom_site_label_3 
 _geom_angle 
 _geom_angle_site_symmetry_1 
 _geom_angle_site_symmetry_3 
 _geom_angle_publ_flag 
C1 O1 C3 109.02(14) . . ? 
C2 O2 C3 107.78(15) . . ? 
C23 O3 C21 107.81(14) . . ? 
C22 O4 C23 108.06(14) . . ? 
C36 O5 C18 121.08(14) . . ? 
O1 C1 C2 105.52(17) . . ? 
O2 C2 C1 106.75(19) . . ? 
O2 C3 O1 105.60(14) . . ? 
O2 C3 C4 111.65(16) . . ? 
O1 C3 C4 110.00(16) . . ? 
O2 C3 C7 115.16(16) . . ? 
O1 C3 C7 110.05(15) . . ? 
C4 C3 C7 104.41(15) . . ? 
C3 C4 C5 106.26(16) . . ? 
C6 C5 C4 103.33(16) . . ? 
C12 C6 C5 119.35(16) . . ? 
C12 C6 C7 113.76(15) . . ? 
C5 C6 C7 104.39(15) . . ? 
C9 C7 C6 109.22(16) . . ? 
C9 C7 C8 110.63(17) . . ? 
C6 C7 C8 113.15(16) . . ? 
C9 C7 C3 117.26(16) . . ? 
C6 C7 C3 98.64(15) . . ? 
C8 C7 C3 107.55(16) . . ? 
C7 C9 C10 111.51(16) . . ? 
C11 C10 C9 112.31(17) . . ? 
C16 C11 C10 113.91(16) . . ? 
C16 C11 C12 110.96(15) . . ? 
C10 C11 C12 111.28(16) . . ? 
C13 C12 C6 112.77(15) . . ? 
C13 C12 C11 109.29(16) . . ? 
C6 C12 C11 108.57(15) . . ? 
C12 C13 C14 110.22(17) . . ? 
C15 C14 C13 113.04(16) . . ? 
C17 C15 C16 119.86(18) . . ? 
C17 C15 C14 117.64(17) . . ? 
C16 C15 C14 122.41(17) . . ? 
C20 C16 C15 117.93(17) . . ? 
C20 C16 C11 121.08(17) . . ? 
C15 C16 C11 120.99(17) . . ? 
C18 C17 C15 120.35(18) . . ? 
C17 C18 C19 121.29(17) . . ? 
C17 C18 O5 120.18(17) . . ? 
C19 C18 O5 118.09(17) . . ? 
C18 C19 C20 118.47(18) . . ? 
C19 C20 C16 122.06(18) . . ? 
O3 C21 C22 102.17(15) . . ? 
O4 C22 C21 102.44(15) . . ? 
O4 C23 O3 106.29(14) . . ? 
O4 C23 C27 111.81(15) . . ? 
O3 C23 C27 112.20(15) . . ? 
O4 C23 C24 113.58(15) . . ? 
O3 C23 C24 108.99(15) . . ? 
C27 C23 C24 104.08(15) . . ? 
C23 C24 C25 106.56(15) . . ? 
C26 C25 C24 103.72(14) . . ? 
C31 C26 C25 120.12(15) . . ? 
C31 C26 C27 111.42(14) . . ? 
C25 C26 C27 103.95(14) . . ? 
C28 C27 C40 110.03(15) . . ? 
C28 C27 C23 116.94(15) . . ? 
C40 C27 C23 107.43(15) . . ? 
C28 C27 C26 109.13(14) . . ? 
C40 C27 C26 113.50(15) . . ? 
C23 C27 C26 99.58(14) . . ? 
C27 C28 C29 110.94(15) . . ? 
C28 C29 C30 111.59(14) . . ? 
C35 C30 C31 110.16(14) . . ? 
C35 C30 C29 113.73(15) . . ? 
C31 C30 C29 109.66(14) . . ? 
C26 C31 C32 116.20(14) . . ? 
C26 C31 C30 108.92(14) . . ? 
C32 C31 C30 110.29(14) . . ? 
C31 C32 C33 108.35(15) . . ? 
C34 C33 C32 111.45(15) . . ? 
C35 C34 C39 120.01(16) . . ? 
C35 C34 C33 123.76(17) . . ? 
C39 C34 C33 116.22(16) . . ? 
C34 C35 C36 118.30(16) . . ? 
C34 C35 C30 121.85(16) . . ? 
C36 C35 C30 119.81(15) . . ? 
C37 C36 O5 124.00(16) . . ? 
C37 C36 C35 124.75(17) . . ? 
O5 C36 C35 111.21(15) . . ? 
C36 C37 C38 119.94(16) . . ? 
O7 C38 C37 124.41(17) . . ? 
O7 C38 C39 118.85(17) . . ? 
C37 C38 C39 116.68(16) . . ? 
O6 C39 C34 122.03(17) . . ? 
O6 C39 C38 119.43(17) . . ? 
C34 C39 C38 118.51(16) . . ? 
  
_diffrn_measured_fraction_theta_max    0.997 
_diffrn_reflns_theta_full              25.00 
_diffrn_measured_fraction_theta_full   1.000 
_refine_diff_density_max    0.229 
_refine_diff_density_min   -0.188 
_refine_diff_density_rms    0.035 
